# Supplementary material
Source: publisher figshare collection journal article supplement (https://tandf.figshare.com/articles/dataset/_/11468055)
Supplement: Supplementary file 1 [file 1]

**Supplementary Table 2.** The average of seasonal CH<sub>4</sub> emissions, water use, production cost and seasonal yield-scaled CH<sub>4</sub> emissions, water use, and production cost.

| Treatment                                                                                                                 | CH <sub>4</sub> emissions<br>(kg ha <sup>-1</sup> ) | Total water use<br>(m <sup>3</sup> ha <sup>-1</sup> ) | Production costs<br>(USD ha <sup>-1</sup> ) | Rice grain yield<br>(Mg ha <sup>-1</sup> ) | Yield-scaled<br>CH <sub>4</sub> emission<br>(kg CH <sub>4</sub> Mg <sup>-1</sup> ) | Yield-scaled<br>water use<br>(m <sup>3</sup> H <sub>2</sub> O Mg <sup>-1</sup> ) | Yield-scaled<br>production cost<br>(USD Mg <sup>-1</sup> ) |
|---------------------------------------------------------------------------------------------------------------------------|-----------------------------------------------------|-------------------------------------------------------|---------------------------------------------|--------------------------------------------|------------------------------------------------------------------------------------|----------------------------------------------------------------------------------|------------------------------------------------------------|
| CTC                                                                                                                       | 266±2.83 a                                          | 12,100±387 A                                          | 741±5.59 c                                  | 6.60±0.05 B                                | 40.4±0.78 a                                                                        | 1,840±70.9 CD                                                                    | 112±1.65 d                                                 |
| CTA                                                                                                                       | 221±14.7 bc                                         | 11,300±986 A                                          | 735±5.97 c                                  | 6.37±0.11 C                                | 35.0±4.36 ab                                                                       | 1,770±121 D                                                                      | 116±1.17 d                                                 |
| BIC                                                                                                                       | 161±7.53 de                                         | 12,700±436 A                                          | 730±6.25 c                                  | 5.19±0.01 E                                | 31.1±3.68 abc                                                                      | 2,450±86.6 A                                                                     | 141±1.42 b                                                 |
| BIA                                                                                                                       | 129±1.30 e                                          | 11,700±491 A                                          | 723±4.98 c                                  | 5.18±0.01 E                                | 24.9±0.25 c                                                                        | 2,250±93.2 AB                                                                    | 139±1.12 b                                                 |
| BCC                                                                                                                       | 188±13.3 cd                                         | 12,600±701 A                                          | 1,070±8.28 a                                | 5.81±0.02 D                                | 32.4±2.16 abc                                                                      | 2,160±112 ABC                                                                    | 184±0.71 a                                                 |
| BCA                                                                                                                       | 156±1.90 de                                         | 11,700±723 A                                          | 1,063±5.39 a                                | 5.74±0.07 D                                | 27.2±0.89 bc                                                                       | 2,030±149 BCD                                                                    | 185±3.02 a                                                 |
| BFC                                                                                                                       | 237±2.32 ab                                         | 12,000±325 A                                          | 903±7.48 b                                  | 6.85±0.04 A                                | 34.6±0.45 abc                                                                      | 1,750±56.4 D                                                                     | 132±1.83 c                                                 |
| BFA                                                                                                                       | 190±12.8 cd                                         | 11,200±291 A                                          | 897±0.54 b                                  | 6.59±0.02 B                                | 29.1±3.59 bc                                                                       | 1,700±48.1 D                                                                     | 136±0.29 bc                                                |
| Amendment comparison (these values derived from the average of the same amendment treatment under both water managements) |                                                     |                                                       |                                             |                                            |                                                                                    |                                                                                  |                                                            |
| CT                                                                                                                        | 244±5.94 a                                          | 11,700±686 A                                          | 738±5.78 c                                  | 6.48±0.03 B                                | 37.7±2.57 a                                                                        | 1,800±96.0 B                                                                     | 114±0.24 d                                                 |
| BI                                                                                                                        | 145±3.11 d                                          | 12,200±464 A                                          | 726±5.61 c                                  | 5.19±0.01 D                                | 28.0±1.72 b                                                                        | 2,350±89.9 A                                                                     | 140±1.27 b                                                 |
| BC                                                                                                                        | 172±7.12 c                                          | 12,100±712 A                                          | 1,066±6.84 a                                | 5.78±0.02 C                                | 29.8±0.63 b                                                                        | 2,090±130 AB                                                                     | 185±1.86 a                                                 |
| BF                                                                                                                        | 214±5.24 b                                          | 11,600±172 A                                          | 900±4.01 b                                  | 6.72±0.01 A                                | 31.9±1.57 ab                                                                       | 1,730±41.6 B                                                                     | 134±0.77 c                                                 |

The values are the average of two growing seasons. Means±SE with different letters indicate significant difference at the 5% level. CT is
