# Supplementary material
Source: publisher figshare collection journal article supplement (https://tandf.figshare.com/articles/dataset/_/11468055)
Supplement: Supplementary file 2 [file 1]

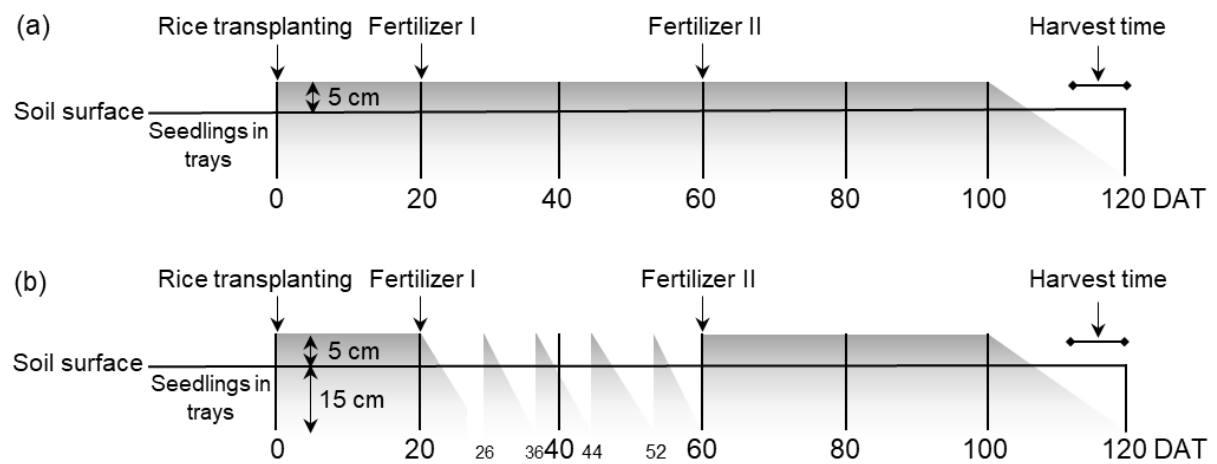

**Supplementary Figure 1.** Diagrams of water level controlling in the rice field for the practices of conventional system (a) and AWD system (b).
