# Supplementary material
Source: publisher figshare collection journal article supplement (https://tandf.figshare.com/articles/dataset/_/11468055)
Supplement: Supplementary file 3 [file 1]

**Supplementary Table 3.** The effect comparison of each factor on seasonal CH<sub>4</sub> emissions, water use, production cost and seasonal yield-scaled CH<sub>4</sub> emissions, water use, and production cost.

| Treatment                                                                                                                                        | CH <sub>4</sub> emissions<br>(kg ha <sup>-1</sup> ) | Total water use<br>(m <sup>3</sup> ha <sup>-1</sup> ) | Production costs<br>(USD ha <sup>-1</sup> ) | Rice grain yield<br>(Mg ha <sup>-1</sup> ) | Yield-scaled<br>CH <sub>4</sub> emission<br>(kg CH <sub>4</sub> Mg <sup>-1</sup> ) | Yield-scaled<br>water use<br>(m <sup>3</sup> H <sub>2</sub> O Mg <sup>-1</sup> ) | Yield-scaled<br>production cost<br>(USD Mg <sup>-1</sup> ) |
|--------------------------------------------------------------------------------------------------------------------------------------------------|-----------------------------------------------------|-------------------------------------------------------|---------------------------------------------|--------------------------------------------|------------------------------------------------------------------------------------|----------------------------------------------------------------------------------|------------------------------------------------------------|
| Biochar effect (CT is average of CTC and CTA; BF is average of BFC and BFA)                                                                      |                                                     |                                                       |                                             |                                            |                                                                                    |                                                                                  |                                                            |
| CT                                                                                                                                               | 244±5.94 a                                          | 11,700±686 A                                          | 738±5.78 b                                  | 6.48±0.03 B                                | 37.7±2.57 a                                                                        | 1,800±96.0 A                                                                     | 114±0.24 b                                                 |
| BF                                                                                                                                               | 214±5.24 b                                          | 11,600±17.2 A                                         | 900±4.01 a                                  | 6.72±0.01 A                                | 31.9±1.57 a                                                                        | 1,730±4.16 A                                                                     | 134±0.77 a                                                 |
| <i>p</i> value                                                                                                                                   | < 0.05                                              | 0.87                                                  | < 0.05                                      | < 0.05                                     | 0.14                                                                               | 0.46                                                                             | < 0.05                                                     |
| Compost effect (BI is average of BIC and BIA; BC is average of BCC and BCA)                                                                      |                                                     |                                                       |                                             |                                            |                                                                                    |                                                                                  |                                                            |
| BI                                                                                                                                               | 145±3.11 b                                          | 12,200±464 A                                          | 726±5.61 b                                  | 5.19±0.01 B                                | 28.0±1.72 a                                                                        | 2,350±89.9 A                                                                     | 140±1.27 b                                                 |
| BC                                                                                                                                               | 172±7.12 a                                          | 12,100±712 A                                          | 1,066±6.84 a                                | 5.78±0.02 A                                | 29.8±0.63 a                                                                        | 2,090±130 A                                                                      | 185±1.86 a                                                 |
| <i>p</i> value                                                                                                                                   | < 0.05                                              | 0.90                                                  | < 0.05                                      | < 0.05                                     | 0.37                                                                               | 0.17                                                                             | < 0.05                                                     |
| Chemical fertilizer effect (BI is average of BIC and BIA; BF is average of BFC and BFA)                                                          |                                                     |                                                       |                                             |                                            |                                                                                    |                                                                                  |                                                            |
| BI                                                                                                                                               | 145±3.11 b                                          | 12,200±464 A                                          | 726±5.61 b                                  | 5.19±0.01 B                                | 28.0±1.72 a                                                                        | 2,350±89.9 A                                                                     | 185±1.86 a                                                 |
| BF                                                                                                                                               | 214±5.24 a                                          | 11,600±17.2 A                                         | 900±4.01 a                                  | 6.72±0.01 A                                | 31.9±1.57 a                                                                        | 1,730±4.16 A                                                                     | 134±0.77 b                                                 |
| <i>p</i> value                                                                                                                                   | < 0.05                                              | 0.32                                                  | < 0.05                                      | < 0.05                                     | 0.15                                                                               | 0.06                                                                             | < 0.05                                                     |
| Water management effect (Conventional is average of all treatments under conventional system; AWD is average of all treatments under AWD system) |                                                     |                                                       |                                             |                                            |                                                                                    |                                                                                  |                                                            |
| Conventional                                                                                                                                     | 213±5.65 a                                          | 12,300±244 A                                          | 861±3.78 a                                  | 6.11±0.02 A                                | 34.6±0.69 a                                                                        | 2,050±38.1 A                                                                     | 142±0.69 a                                                 |
| AWD                                                                                                                                              | 173±6.75 b                                          | 11,500±232 B                                          | 855±1.73 a                                  | 5.97±0.02 A                                | 29.1±0.35 b                                                                        | 1,940±32.1 A                                                                     | 144±1.11 a                                                 |
| <i>p</i> value                                                                                                                                   | < 0.05                                              | < 0.05                                                | 0.22                                        | 0.10                                       | < 0.05                                                                             | 0.09                                                                             | 0.14                                                       |

Means $\pm$ SE with different letters indicate significant difference at the 5% level.  $p$  values  $< 0.05$  indicates the significant difference by Independent Samples T-test.
