# Supplementary material
Source: publisher figshare collection journal article supplement (https://tandf.figshare.com/articles/dataset/_/11468055)
Supplement: Supplementary file 4 [file 1]

Archive with 5 entries (5 files):
- tssp_a_1706431_sm8749.pdf
- tssp_a_1706431_sm8748.pdf
- tssp_a_1706431_sm8747.pdf
- tssp_a_1706431_sm8746.pdf
- tssp_a_1706431_sm8745.pdf
