# Supplementary material
Source: publisher figshare collection journal article supplement (https://tandf.figshare.com/articles/dataset/_/11468055)
Supplement: Supplementary file 4 [file 1 › tssp_a_1706431_sm8745.pdf]

**Supplementary Table 1.** The dates of crop cultivation and management.

| Activities                      | First season (wet season) |                     | Second season (dry season) |                    |
|---------------------------------|---------------------------|---------------------|----------------------------|--------------------|
|                                 | Date (DAT)                | Treatment           | Date (DAT)                 | Treatment          |
| Incorporation with crop residue | 31/07/15 (-30)            | All                 | 22/01/16 (-30)             | All                |
| Incorporation with biochar      | 10/08/15 (-20)            | All except CTC, CTA | -                          | -                  |
| Incorporation with compost      | 10/08/15 (-20)            | BCC, BCA            | 01/02/16 (-20)             | BCC, BCA           |
| Seedling preparation            | 15/08/15 (-15)            | All                 | 06/02/16 (-15)             | All                |
| Harrow plowing                  | 29/08/15 (-01)            | All                 | 20/02/16 (-01)             | All                |
| Rice transplanting              | 30/08/15 (-00)            | All                 | 21/02/16 (-00)             | All                |
| Basal fertilizer                | 19/09/15 (20)             | CTC, CTA, BFC, BFA  | 12/03/16 (20)              | CTC, CTA, BFC, BFA |
| Top dressing fertilizer         | 29/10/15 (60)             | CTC, CTA, BFC, BFA  | 21/04/16 (60)              | CTC, CTA, BFC, BFA |
| Pregnant beginning observed     | 01/11/15 (63)             | CTC, CTA, BFC, BFA  | 23/04/16 (62)              | CTC, CTA, BFC, BFA |
|                                 | 07/11/15 (69)             | BCC, BCA            | 27/04/16 (66)              | BCC, BCA           |
|                                 | 09/11/15 (71)             | BIC, BIA            | 31/05/16 (70)              | BIC, BIA           |
| Flowering beginning observed    | 06/11/15 (68)             | CTC, CTA, BFC, BFA  | 28/04/16 (67)              | CTC, CTA, BFC, BFA |
|                                 | 13/11/15 (75)             | BCC, BCA            | 03/05/16 (73)              | BCC, BCA           |
|                                 | 14/11/15 (76)             | BIC, BIA            | 05/05/16 (75)              | BIC, BIA           |
| 100% panicle production         | 25/11/15 (87)             | CTC, CTA, BFC, BFA  | 17/05/16 (86)              | CTC, CTA, BFC, BFA |
|                                 | 28/11/15 (90)             | BCC, BCA            | 21/05/16 (90)              | BCC, BCA           |
|                                 | 30/11/15 (92)             | BIC, BIA            | 23/05/16 (92)              | BIC, BIA           |
| Dried field allowing to harvest | 04 /12/15 (96)            | CTC, CTA, BFC, BFA  | 28/05/16 (97)              | CTC, CTA, BFC, BFA |
|                                 | 08/12/15 (100)            | BCC, BCA            | 01/06/16 (101)             | BCC, BCA           |
|                                 | 09/12/15 (101)            | BIC, BIA            | 03/06/16 (103)             | BIC, BIA           |
| Harvesting                      | 18/12/15 (110)            | CTC, CTA, BFC, BFA  | 11/06/16 (111)             | CTC, CTA, BFC, BFA |
|                                 | 23/12/15 (115)            | BCC, BCA            | 16/06/16 (116)             | BCC, BCA           |
|                                 | 24/12/15 (116)            | BIC, BIA            | 18/06/16 (118)             | BIC, BIA           |
