# Supplementary material
Source: publisher figshare collection journal article supplement (https://tandf.figshare.com/articles/dataset/_/11468055)
Supplement: Supplementary file 4 [file 1 › tssp_a_1706431_sm8748.pdf]

**Supplementary Table 4.** Annual production cost, income and net profit of rice cultivation with biochar application and co-applications under two water management systems.

| Treatment | Production cost (USD ha <sup>-1</sup> year <sup>-1</sup> ) |               |         |      |         |         |                     |      |                  |              | Income                                                | Net profit                                                  |
|-----------|------------------------------------------------------------|---------------|---------|------|---------|---------|---------------------|------|------------------|--------------|-------------------------------------------------------|-------------------------------------------------------------|
|           | Wages                                                      |               |         | Seed | Biochar | Compost | Chemical fertilizer |      | Electricity cost | Total        | (2)<br><br>(USD ha <sup>-1</sup> year <sup>-1</sup> ) | (2) – (1)<br><br>(USD ha <sup>-1</sup> year <sup>-1</sup> ) |
|           | Tillage                                                    | Transplanting | Harvest |      |         |         | Compound            | Urea |                  |              |                                                       |                                                             |
| CTC       | 244                                                        | 367           | 367     | 51   | 0       | 0       | 200                 | 153  | 102±11.2 a       | 1,480±11.2 C | 4,280±30.6 b                                          | 2,800±41.8 A                                                |
| CTA       | 244                                                        | 367           | 367     | 51   | 0       | 0       | 200                 | 153  | 90.6±11.9 a      | 1,470±11.9 C | 4,140±68.9 c                                          | 2,670±56.9 AB                                               |
| BIC       | 244                                                        | 367           | 367     | 51   | 325     | 0       | 0                   | 0    | 108±12.5 a       | 1,460±12.5 C | 3,370±5.36 e                                          | 1,910±17.8 D                                                |
| BIA       | 244                                                        | 367           | 367     | 51   | 325     | 0       | 0                   | 0    | 94.0±9.97 a      | 1,450±9.97 C | 3,370±2.30 e                                          | 1,920±12.3 D                                                |
| BCC       | 244                                                        | 367           | 367     | 51   | 325     | 682     | 0                   | 0    | 106±16.6 a       | 2,140±16.6 A | 3,770±14.5 d                                          | 1,630±2.03 E                                                |
| BCA       | 244                                                        | 367           | 367     | 51   | 325     | 682     | 0                   | 0    | 93.0±10.8 a      | 2,130±10.8 A | 3,730±42.9 d                                          | 1,600±53.6 E                                                |
| BFC       | 244                                                        | 367           | 367     | 51   | 325     | 0       | 200                 | 153  | 101±15.0 a       | 1,810±15.0 B | 4,450±25.3 a                                          | 2,640±40.2 B                                                |
| BFA       | 244                                                        | 367           | 367     | 51   | 325     | 0       | 200                 | 153  | 89.6±1.08 a      | 1,790±1.08 B | 4,280±11.5 b                                          | 2,480±10.4 C                                                |

This study assumed that two cultivation seasons per year. Electricity was used for irrigation water pumping at a pumping rate of 30 m<sup>3</sup> h<sup>-1</sup> and the cost of electricity per hour was 0.15 USD h<sup>-1</sup>.
